# Supplementary material for: Dense-CaptionNet: a Sentence Generation Architecture for Fine-grained Description of Image Semantics
Source: Springer Nature journal article supplement (doi:10.1007/s12559-019-09697-1), 2020-03-02
Supplement: 12559_2019_9697_MOESM1_ESM.pdf [file 12559_2019_9697_MOESM1_ESM.pdf]

## Supplementary Material

**Journal:** Cognitive Computation

**Paper Title:** Dense-CaptionNet: A detailed sentence generation architecture for dense image captioning

**Table 1: Qualitative Results – IAPR TC-12 dataset**

Comparison with existing state-of-the-art techniques. The first row against each image illustrates the descriptions obtained (using 6,802 images of IAPR TC-12 dataset) on [NeuralTalk \(DeepVS\)](#) [1]. The 2nd-5th rows show the descriptions obtained by [Show, Attend and Tell \(Hard Attention\)](#) [2], [SemStyle](#) [3], [Up-Down-Captioner](#) [4] and the proposed [Dense-CaptionNet](#), respectively.

|                         |    |   |
|-------------------------|---------------------------------------------------------------------------------------|---------------------------------------------------------------------------------------|
| DeepVS [1]              | A large body of water with a boat in the background.                                  | A man holding a surfboard on top of a beach.                                          |
| Hard Attention [2]      | A view of a large body of water.                                                      | A man standing in the middle of a river.                                              |
| SemStyle [3]            | I 'm going to be the beach.                                                           | The man who held a knife.                                                             |
| Up-Down-Captioner [4]   | A large body of water on a beach.                                                     | A man holding a frisbee on a beach.                                                   |
| <b>Dense-CaptionNet</b> | <b>A body of water with blue water, white clouds in a blue sky in the background.</b> | <b>A man in white shirt and shorts standing on a beach holding onto a skateboard.</b> |

|                         |                                                                                     |                                                                                       |
|-------------------------|-------------------------------------------------------------------------------------|---------------------------------------------------------------------------------------|
|                         |   |    |
| DeepVS [1]              | A large body of water with a bridge in the background.                              | A man riding a wave on top of a surfboard.                                            |
| Hard Attention [2]      | A view of a large body of water.                                                    | A person riding a snowboard down a snow covered slope.                                |
| SemStyle [3]            | I 'll be coming up to the mountain.                                                 | A man who rode wave on top of the top of the surfboard.                               |
| Up-Down-Captioner [4]   | A view of a city skyline with a clock tower.                                        | A river in the water with a mountain in the water.                                    |
| <b>Dense-CaptionNet</b> | <b>A scene to a white building, a blue sky in the city.</b>                         | <b>Trees on the shore, a landscape, a large mountain range in the distance.</b>       |
|                         |  |  |
| DeepVS [1]              | A view of a mountain in the distance.                                               | A man wearing a hat and a hat on a motorcycle.                                        |
| Hard Attention [2]      | A lone giraffe standing in the middle of a field.                                   | A man wearing a helmet and a helmet on a motorcycle.                                  |
| SemStyle [3]            | I 'll be coming up to the mountain.                                                 | A man who wore a helmet.                                                              |
| Up-Down-Captioner [4]   | A small tree next to a tree in a forest.                                            | A close up of a person talking on a cell phone.                                       |
| <b>Dense-CaptionNet</b> | <b>A small green tree with a tall green tree in the middle of an area.</b>          | <b>A man on a motorcycle with a red shirt and a pair of shoes on the street.</b>      |

|                       |                                                                                    |                                                                                           |
|-----------------------|------------------------------------------------------------------------------------|-------------------------------------------------------------------------------------------|
|                       |  |        |
| DeepVS [1]            | A bedroom with a bed and a table.                                                  | A view of a lake with a bridge and a river.                                               |
| Hard Attention [2]    | A bedroom with a bed and a bed.                                                    | A large body of water with a boat in the background.                                      |
| SemStyle [3]          | I climb into bed and then i stormed into the room.                                 | " i 'll be coming up to the mountain .                                                    |
| Up-Down-Captioner [4] | A bed with a bed and a bed in it.                                                  | A boat in the water near the water.                                                       |
| Dense-CaptionNet      | <b>A bed with a comforter and a wooden headboard.</b>                              | <b>A boat with blue white water, a large body of water and a large rock in the water.</b> |

**Table 2: Qualitative Results on MSCOCO**

Comparison with state-of-the-art techniques. The first row against each image shows MSCOCO descriptions. The 2nd- 6th rows show the descriptions obtained by [NeuralTalk \(DeepVS\)](#) [1], [Show, Attend and Tell \(Hard Attention\)](#) [2], [SemStyle](#) [3], [Up-Down-Captioner](#) [4] and the proposed [Dense-CaptionNet](#), respectively.

|                         |                                                                                                                                                                                                                                                                                                                                                                                                   |                                                                                                                                                                                                                                                                                                                                       |
|-------------------------|---------------------------------------------------------------------------------------------------------------------------------------------------------------------------------------------------------------------------------------------------------------------------------------------------------------------------------------------------------------------------------------------------|---------------------------------------------------------------------------------------------------------------------------------------------------------------------------------------------------------------------------------------------------------------------------------------------------------------------------------------|
|                         |                                                                                                                                                                                                                                                                                                                  |                                                                                                                                                                                                                                                    |
| MSCOCO Descriptions     | <ul style="list-style-type: none"> <li>- A home computer and mouse on a desk.</li> <li>- A desk that has a computer and other various items on it.</li> <li>- A movie is playing on the computer monitor.</li> <li>- A computer, key board, cell phones and other electronic gadgets are on the table.</li> <li>- A computer desk topped with a desktop computer monitor and keyboard.</li> </ul> | <ul style="list-style-type: none"> <li>- This is a man riding a red crotch rocket.</li> <li>- A man is riding a motorcycle on a road.</li> <li>- A man that is riding around on a motorcycle.</li> <li>- A motorcycle rider on a red silver and black motorcycle.</li> <li>- A man riding on the back of a red motorcycle.</li> </ul> |
| DeepVS [1]              | a desk with a laptop and a monitor                                                                                                                                                                                                                                                                                                                                                                | a man riding a motorcycle down a street                                                                                                                                                                                                                                                                                               |
| Hard Attention [2]      | a laptop computer sitting on top of a desk.                                                                                                                                                                                                                                                                                                                                                       | a man riding a motorcycle down a street.                                                                                                                                                                                                                                                                                              |
| SemStyle [3]            | i sat up at the computer desk and logged onto the computer .                                                                                                                                                                                                                                                                                                                                      | the man rode his motorcycle on the road .                                                                                                                                                                                                                                                                                             |
| Up-Down-Captioner [4]   | A computer desk with a computer and a keyboard.                                                                                                                                                                                                                                                                                                                                                   | A person riding a red motorcycle on the street.                                                                                                                                                                                                                                                                                       |
| <b>Dense-CaptionNet</b> | a desk with a laptop, a keyboard, a mouse and a monitor.                                                                                                                                                                                                                                                                                                                                          | a man wearing a helmet is riding a motorcycle                                                                                                                                                                                                                                                                                         |
|                         |                                                                                                                                                                                                                                                                                                                |                                                                                                                                                                                                                                                  |
| MSCOCO Descriptions     | <ul style="list-style-type: none"> <li>- Small bird perched on a branch in a wooden area.</li> <li>- A small bird perched on top of a tree branch.</li> <li>- A small bird sitting on a small branch in</li> </ul>                                                                                                                                                                                | <ul style="list-style-type: none"> <li>- A man is playing video games on a screen.</li> <li>- A man prepares to swing while playing a video game.</li> <li>- An person relishing it on a</li> </ul>                                                                                                                                   |

|                         |                                                                                                                                                                                                                                                                                                                                                                            |                                                                                                                                                                                                                                                                                                                                                            |
|-------------------------|----------------------------------------------------------------------------------------------------------------------------------------------------------------------------------------------------------------------------------------------------------------------------------------------------------------------------------------------------------------------------|------------------------------------------------------------------------------------------------------------------------------------------------------------------------------------------------------------------------------------------------------------------------------------------------------------------------------------------------------------|
|                         | <p>a tree.</p> <ul style="list-style-type: none"> <li>- A small bird perched on a branch of tree.</li> <li>- A bird sitting in a tree on a branch.</li> </ul>                                                                                                                                                                                                              | <p>good daytime.</p> <ul style="list-style-type: none"> <li>- A person is playing wii on the tv in the room.</li> <li>- The boy is holding a remote as he plays a game</li> </ul>                                                                                                                                                                          |
| DeepVS [1]              | a bird sitting on a branch in a tree                                                                                                                                                                                                                                                                                                                                       | a man playing a video game in a living room                                                                                                                                                                                                                                                                                                                |
| Hard Attention [2]      | a bird sitting on top of a tree branch.                                                                                                                                                                                                                                                                                                                                    | a man is playing a video game in a living room                                                                                                                                                                                                                                                                                                             |
| SemStyle [3]            | i was sitting at the bird 's sitting on the tree branch .                                                                                                                                                                                                                                                                                                                  | " the man who is playing games , " she said , " a game                                                                                                                                                                                                                                                                                                     |
| Up-Down-Captioner [4]   | A small bird perched on a tree branch.                                                                                                                                                                                                                                                                                                                                     | A man is playing a video game on a television.                                                                                                                                                                                                                                                                                                             |
| <b>Dense-CaptionNet</b> | A bird sitting on a tree branch with leaves on it                                                                                                                                                                                                                                                                                                                          | A man standing in front of a screen tv holding a game controller                                                                                                                                                                                                                                                                                           |
|                         |                                                                                                                                                                                                                                                                                          |                                                                                                                                                                                                                                                                        |
| MSCOCO Descriptions     | <ul style="list-style-type: none"> <li>- A computer sitting on a see through desk</li> <li>- A desktop computer sitting on top of a glass table</li> <li>- A home computer on a desk in a room</li> <li>- Many electronic devices and a tangle of wires are on and around the desk</li> <li>- A home office with a chrome and glass desk and computer equipment</li> </ul> | <ul style="list-style-type: none"> <li>- A computer monitor sitting on top of a computer desk.</li> <li>- A metal and glass computer desk by a window.</li> <li>- A modern glass and metal desk with multiple computers on it.</li> <li>- A computer monitor is on top of a glass desk.</li> <li>- A computer atop a glass table near a window.</li> </ul> |
| DeepVS [1]              | a desk with a computer monitor and keyboard                                                                                                                                                                                                                                                                                                                                | a desk with a computer monitor and keyboard                                                                                                                                                                                                                                                                                                                |
| Hard Attention [2]      | a desk with a computer and a monitor.                                                                                                                                                                                                                                                                                                                                      | a desk with a computer and a monitor.                                                                                                                                                                                                                                                                                                                      |
| SemStyle [3]            | i sat up at the computer desk.                                                                                                                                                                                                                                                                                                                                             | i sat up at the office desk and logged onto the computer .                                                                                                                                                                                                                                                                                                 |
| Up-Down-Captioner [4]   | A desk with a computer and mouse on it.                                                                                                                                                                                                                                                                                                                                    | A computer desk with a computer monitor and a monitor.                                                                                                                                                                                                                                                                                                     |
| <b>Dense-CaptionNet</b> | A desk with a laptop a keyboard a mouse and a monitor                                                                                                                                                                                                                                                                                                                      | A desk with a laptop a keyboard a mouse and a monitor                                                                                                                                                                                                                                                                                                      |

**References:**

[1] A. Karpathy, L. Fei-Fei, Deep visual-semantic alignments for generating image descriptions, *IEEE Transactions on Pattern Analysis and Machine Intelligence* 39 (4) (2017) 664–676. doi:10.1109/TPAMI.2016.2598339

[2] K. Xu, J. Ba, R. Kiros, K. Cho, A. Courville, R. Salakhudinov, R. Zemel, Y. Bengio, Show, attend and tell: Neural image caption generation with visual attention, in: *International Conference on Machine Learning*, 2015, pp. 2048–2057.

[3] A. Mathews, L. Xie, X. He, Semstyle: Learning to generate stylised image captions using unaligned text, in: *Proceedings of the IEEE Conference on Computer Vision and Pattern Recognition*, 2018, pp. 8591–8600.

[4] P. Anderson, X. He, C. Buehler, D. Teney, M. Johnson, S. Gould, L. Zhang, Bottom-up and top-down attention for image captioning and visual question answering, in: *CVPR*, Vol. 3, 2018, p. 6
